Research Paper: Gerotarget(Focus on Aging)

## How does white matter microstructure differ between the vascular and amnesic mild cognitive impairment?

Yang Yu<sup>1,\*</sup>, Xinyu Liang<sup>3,\*</sup>, Haikuo Yu<sup>5</sup>, Weina Zhao<sup>1</sup>, Yan Lu<sup>6</sup>, Yue Huang<sup>7</sup>, Changhao Yin<sup>1</sup>, Gaolang Gong<sup>3</sup>, and Ying Han<sup>2,4</sup>

<sup>1</sup> Department of Neurology, Hongqi Hospital of Mudanjiang Medical University, Mudanjiang, Heilongjiang, China

<sup>2</sup> Department of Neurology, XuanWu Hospital of Capital Medical University, Beijing, China

<sup>3</sup> State Key Laboratory of Cognitive Neuroscience and Learning & IDG/McGovern Institute for Brain Research, Beijing Normal University, Beijing, China

<sup>4</sup> Center of Alzheimer's Disease, Beijing Institute for Brain Disorders, China

<sup>5</sup> Department of Rehabilitation, XuanWu Hospital of Capital Medical University, Beijing, China

<sup>6</sup> Department of Ophthalmology, Xuan Wu Hospital, Capital Medical University, Beijing, China

<sup>7</sup> School of Medical Sciences, Faculty of Medicine, UNSW Australia, Sydney, Australia

\* These authors have contributed equally to this work

**Correspondence to:** Ying Han, **email:** hanying@xwh.ccmu.edu.cn

**Correspondence to:** Gaolang Gong, **email:** gaolang.gong@gmail.com

**Correspondence to:** Changhao Yin, **email:** yinchanghao7916@sina.com

**Keywords:** mild cognitive impairment, neuroimage, Gerotarget

**Received:** September 02, 2016

**Accepted:** December 07, 2016

**Published:** December 15, 2016

### ABSTRACT

**Changes in white matter (WM) microstructure may relate to the pathophysiology of cognitive impairment. Whether WM microstructure differs in two common pre-dementia subtypes, vascular mild cognitive impairment (VaMCI) and amnesic mild cognitive impairment (aMCI), is largely unknown. This study included 28 VaMCI (12 men, age: 46 ~ 77 years) and 34 aMCI patients (14 men, age: 51 ~ 79 years). All patients underwent a battery of neuropsychological tests and structural and diffusion magnetic resonance imaging (MRI) scanning. WM microstructure was quantified using diffusion MRI parameters: fractional anisotropy (FA), mean diffusivity (MD), axial diffusivity (AxD) and radial diffusivity (RD). These parameters were compared between the two patient groups using tract-based spatial statistics (TBSS) after controlling for age, gender, and education. No significant differences in FA/MD/AxD/RD were observed between the VaMCI and aMCI groups, which suggests a similar pattern of WM microstructure in the early stage of cognitive impairment for different dementia types. However, the two groups exhibited significant differences in the relationship between FA and the Auditory Verbal Learning Test (AVLT), which were primarily located around the corona radiata and corpus callosum. Specifically, there were significant positive correlations ( $R = 0.64$ ,  $P < 0.001$ ) between the FA and AVLT in the VaMCI group, but the opposite trend was observed in the aMCI group ( $R = -0.34$ ,  $P = 0.047$ ). The differential relationship between WM and memory between VaMCI and aMCI indicates an independent neuropathology for specific memory deficits in different types of dementia.**

## INTRODUCTION

Vascular cognitive disorders (VCD) represent a wide spectrum of cognitive disorders associated with vascular causes, including vascular mild cognitive impairment (VaMCI) and vascular dementia (VD). VaMCI is defined as the prodromal stage of VD [1, 2]. Another common mild cognitive impairment (MCI) is amnesic MCI (aMCI), which represents the prodromal stage of Alzheimer's disease (AD) [3]. VaMCI and aMCI are highly prevalent MCI subtypes, and both conditions are associated with deficits in multiple cognitive domains, with identical chief complaints in memory deficits [4, 5]. Previous studies suggested that VaMCI patients exhibited more impairment in semantic memory and executive function, and deficits in episodic memory primarily characterized aMCI patients [6, 7].

White matter (WM) plays a critical role in normal cognitive functioning. Aberrant WM microstructure is observed in aMCI and aMCI [8-12]. Notably, VD and AD exhibit different WM impairments in transcallosal prefrontal tracts [13, 14]. However, no direct neuroimaging comparisons between VaMCI and aMCI were performed. Therefore, whether differences in WM impairments appear at very early stages of these two main dementia subtypes is not known.

The present study examined whether WM microstructure differed between VaMCI and aMCI by directly comparing two groups of age-matched patients and whether the relationships between WM and cognition differed between the two groups using diffusion magnetic resonance imaging (MRI) data combined with the tract-based spatial statistics (TBSS) method.

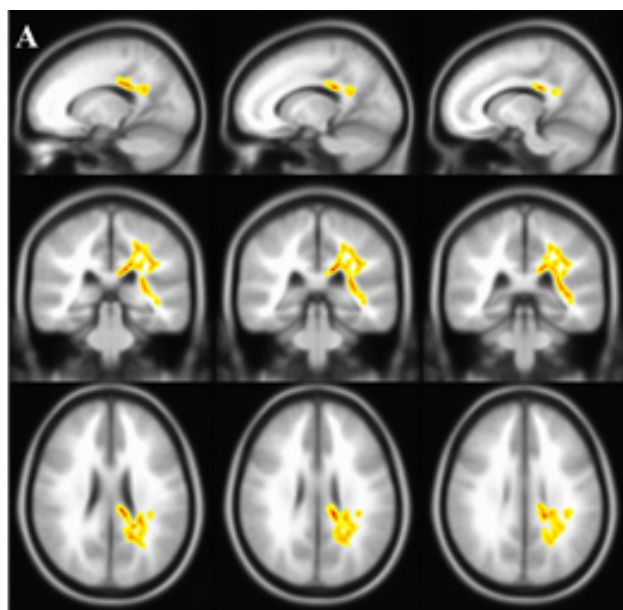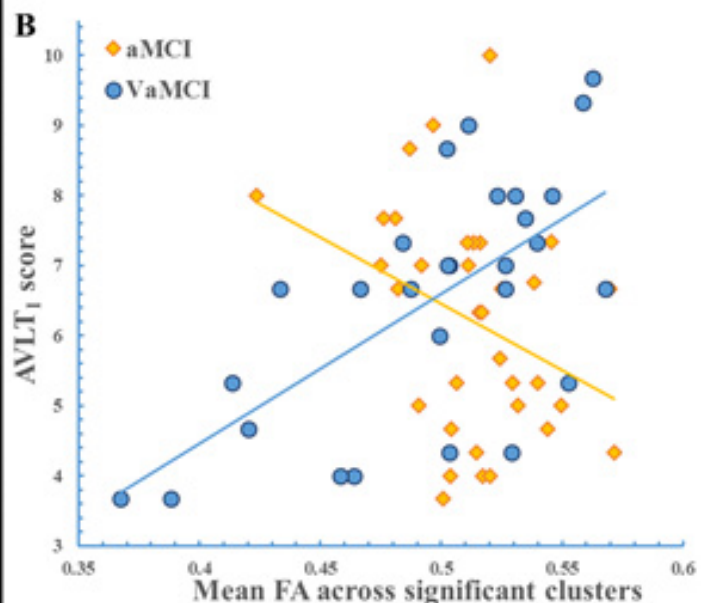

**Figure 1: The “FA × Group” interaction effect on the AVLT<sub>I</sub>.** The clusters showing a significant “FA × group” effect are indicated in a yellow-to-red color. The color represents the F statistic for this interaction. The scatter plot was drawn using the average FA value of the cluster. Panel A, region with a significant “FA × group” effect. Panel B, the scatterplot.

## RESULTS

### Demography and neuropsychological tests

Table 1 shows that no significant differences were observed for age, gender, or education between the two groups. There was a strong difference between the Auditory Verbal Learning Test (AVLT) delayed recall (AVLT<sub>D</sub>) and delayed recognition (AVLT<sub>R</sub>) scores between the two groups ( $P < 0.01$ ), but no differences were found in the Mini-Mental State Examination (MMSE), Montreal Cognitive Assessment (MoCA) and AVLT immediate recall (AVLT<sub>I</sub>) scores. AVLT<sub>D</sub> and AVLT<sub>R</sub> were higher in the VaMCI group than the aMCI group. WM hyperintensity (WMH)/lacunar infarcts were observed in 52 of the 62 subjects. The aMCI group exhibited significantly lower Fazekas scale (FS) scores compared to the VaMCI group ( $P < 0.01$ ) (Table 1). The spatial distribution of abnormal regions for the two groups was not significantly different ( $\chi^2 = 12.17$ ,  $df = 10$ ,  $P = 0.27$ ).

### The association between neuropsychological performance and FS score

There was no significant FS × group interaction effect for any of the neuropsychological scores, which suggests that the relationship between cognitive performance and the FS score did not differ between the two groups.

**Table 1: Demographic information and cognitive testing of the cohorts**

|                                             | aMCI<br>(n = 34) | VaMCI<br>(n = 28) | Group Comparison<br>(p value) |
|---------------------------------------------|------------------|-------------------|-------------------------------|
| Gender (Male/Female)                        | 14/20            | 12/16             | 0.894                         |
| Age (yrs)                                   | 65.50±8.48       | 63.75±9.23        | 0.440                         |
| Education (yrs)                             | 10.21±4.18       | 8.71±3.68         | 0.146                         |
| <b>Auditory Verbal Learning Test (AVLT)</b> |                  |                   |                               |
| <i>Immediately recall</i>                   | 6.21±1.59(34)    | 6.42±1.69(28)     | 0.616                         |
| <i>Delayed recall</i>                       | 3.65±3.30(34)    | 6.46±2.89(28)     | 0.001**                       |
| <i>Delayed recognition</i>                  | 7.18±4.66(34)    | 10.29±2.21(28)    | 0.002**                       |
| <b>MMSE</b>                                 | 24.38±3.89(34)   | 24.57±5.71(27)    | 0.878                         |
| <b>MoCA</b>                                 | 19.79±4.57(34)   | 17.46±7.36(25)    | 0.133                         |
| <b>Fazekas score</b>                        | 0.91±0.75(34)    | 2.54±1.35(28)     | 0.000**                       |

\*\* Indicates  $p < 0.01$

MMSE, the Mini-Mental State Examination; MoCA, the Montreal Cognitive Assessment. Chi-squared test for gender and Student's t tests (two-sided) for the remaining indices were performed to detect differences between the two groups.

### Group comparison of diffusion MRI parameters

There were no significant differences between the VaMCI and aMCI groups in any of the diffusion MRI parameters, i.e., fractional anisotropy (FA), mean diffusivity (MD), axial diffusivity (AxD) and radial diffusivity (RD).

### The association between diffusion MRI parameters and neuropsychological performance

Figure 1 shows that multiple clusters exhibited significant “FA × group” interactions on the AVLT<sub>1</sub>. The significant WM clusters [family-wise error (FWE)-corrected  $P < 0.05$ ] were primarily located around the following areas: (1) projection fibers involving the left posterior corona radiata (PCR), superior corona radiata (SCR), posterior thalamic radiation, and internal capsule; (2) association fibers involving the left sagittal stratum (including the inferior longitudinal fasciculus and inferior fronto-occipital fasciculus), superior longitudinal fasciculus (SLF); and (3) the splenium and body of the corpus callosum (CC). Figure 1 displays the scatterplot in which the mean FA across all significant clusters was used. Post hoc analysis revealed a positive correlation ( $R = 0.64$ ,  $P < 0.001$ ) between the FA and AVLT<sub>1</sub> score in the VaMCI group but a negative correlation in the aMCI group ( $R = -0.34$ ,  $P = 0.047$ ). Notably, the scatterplot of each cluster revealed a very similar pattern for the relationship between

FA and the AVLT<sub>1</sub> scores for the two groups, similar to Figure 1 (see supplementary materials). However, we did not observe any significant “MD × group”, “AxD × group”, or “RD × group” interaction effects on AVLT<sub>1</sub>. There were no “FA, MD, AxD, or RD × group” interaction effects for the other cognitive scores.

### The association between diffusion MRI parameters and FS score

Figure 2 shows that multiple significant WM clusters exhibited an “FA × group” interaction for the FS scores, which suggests a difference in the associations of FA with the FS scores between the two groups. The significant clusters primarily covered the following areas: (1) projection fibers, such as the bilateral PCR, SCR, posterior thalamic radiation, and internal capsule; (2) association fibers, such as left cingulate gyrus, bilateral SLF; and (3) the CC (including the body and splenium). Figure 2 shows the scatterplot using the mean FA value of all significant clusters. There was a positive correlation ( $R = 0.55$ ,  $P = 0.0015$ ) between the FA and FS scores in the aMCI group, but a negative correlation in the VaMCI group ( $R = -0.62$ ,  $P = 0.0011$ ). The scatterplot of each cluster displays a very similar pattern of the relationship between FA and the FS scores for the two groups, which is similar to Figure 2 (See the supplementary materials). However, we did not observe any significant “MD × group”, “AxD × group”, or “RD × group” interaction effect on the FS score.

## DISCUSSION

The present study demonstrated that WM microstructure was not significantly different between the VaMCI and aMCI groups, which are the very early stages of two main types of clinical dementia, VD and AD. Notably, the association between WM microstructure and memory performance in this prodromal stage was significantly different between the two types of MCI. This finding provides new insights into the neuropathological progress of various dementia types.

The first major finding of our study was concerned with WM microstructure differences between the VaMCI and aMCI groups. To the best of our knowledge, our current investigation is the first study that directly compared WM microstructure between VaMCI and aMCI, which are the prodromal stages of two common dementia types. Our present negative results are compatible with previous studies that demonstrated that WM regions with FA, MD, AxD, or RD changes were similar in VaMCI and aMCI compared to healthy controls [10, 12]. One hypothesis to interpret the cognitive impairments in VaMCI patients is that brain dysfunction results from the disruption of large WM tracts [15]. Evidence of the trans-synaptic spread of tau pathology in aMCI led to the hypothesis that abnormal connectivity was a pathological mechanism for aMCI [13, 16-18]. Notably, previous studies demonstrated WM microstructure differences between VD and AD [13, 14], but our data indicated no significant differences between the two types of dementia in the pre-dementia stages. Speculatively, the divergence of WM impairments between the two types

of dementia does not exist at the origin, but it gradually becomes obvious during the development and progression of dementia. This intriguing notion provides valuable insights into WM pathology and the relevant mechanisms underlying different types of dementia.

Notably, the currently used diffusion MRI parameters, including the FA, MD, AxD, and RD, are widely used to successfully detect WM microstructural changes in various brain diseases [19, 20]. However, we cannot exclude the possibility that these imaging indices exhibit a lower sensitivity for the identification of WM differences at the microscopic level. Therefore, other imaging measures for WM are encouraged to validate our currently observed negative results between the VaMCI and aMCI patients.

Notably, neither FA nor  $AVLT_1$  were significantly different between the two groups, but the relationship between these factors exhibited significant differences between the two groups, which were reflected by significant “FA  $\times$  group” interaction effects on the  $AVLT_1$  in a set of clusters. These findings raise the question of whether the two different dementias affect short-term memory independently. Specifically, the  $AVLT_1$  scores decreased as the FA decreased in the VaMCI group. Vascular diseases likely interrupt large WM tracts of cerebral fibers directly. Therefore, the VaMCI patients with more severe WM damage likely performed worse in the  $AVLT_1$  and vice versa. In contrast, the aMCI patients scored higher in the  $AVLT_1$  as the FA decreased. The stronger WM connectivity was likely associated with a compensation mechanism that underlies the memory deficits [21]. The aMCI patients may exhibit enhanced

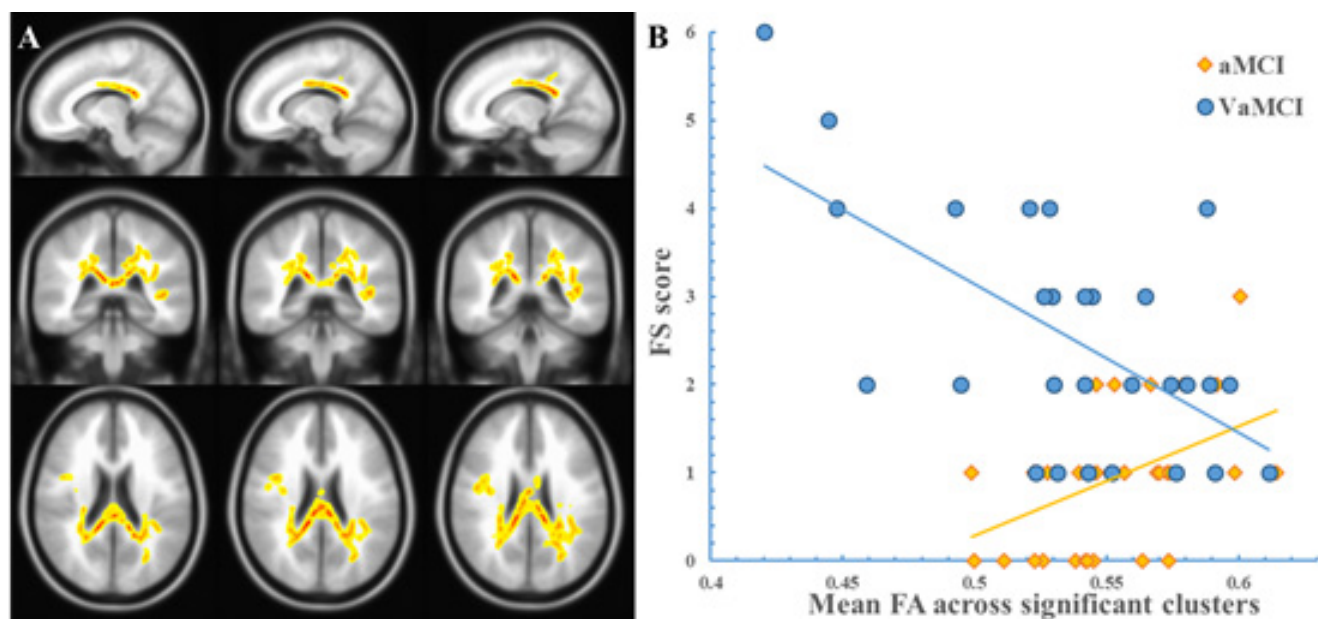

**Figure 2: The “FA  $\times$  Group” interaction effect on the FS score** The clusters showing a significant “FA  $\times$  group” effect are indicated in a yellow-to-red color. The color represents the F statistic for this interaction. The scatterplot was drawn using the average FA value of the cluster. Panel A, the region with a significant “FA  $\times$  group” effect. Panel B, the scatterplot.

WM connections that likely compensate for short-term memory impairments in the pre-dementia stage. This observed interaction indicates that the neuropathological differences in the early stage of dementia between different dementia subtypes may manifest in brain-cognition relationships rather than different brain phenotypes per se. The differences in brain phenotypes become obvious with the progression of dementia. Widely distributed WM impairments [9], including WM regions around the temporal lobe, cingulate and lingual gyri, CC, and bilateral posterior periventricular subcortical structures[8], are observed in VaMCI patients. However, aMCI patients exhibit WM abnormalities in the SLF, external capsule, cingulum bundle, sagittal stratum and fornix, internal capsule, corona radiata, and thalamic radiation [10, 11]. The WM regions in the current study exhibited significant interactions that were largely compatible with these previously reported regions.

The third major finding of the present study was the interaction between the FA and group on the FS score. Multiple visual rating methods for WMH/ lacunar infarcts are used. The Fazekas visual rating is frequently used in clinical and research studies, and this rating method exhibits good reliability [21]. However, this manual rating system only offers a rough and global index of WM abnormality. The FS scores revealed more severe WM impairment in patients with VaMCI than aMCI, which was unlike diffusion MRI parameters. We also observed a significant group difference in the relationship between the FA and FS, which suggests that the FA-FS score relationship differed between the VaMCI and aMCI groups. A trend of more severe WM impairment in FA in the VaMCI group may be associated with an increase in the FS score. Therefore, the direction of WM abnormalities at the macrostructural level, which is represented by the FS score, and the microstructural level, which is represented by FA, were consistent in the VaMCI group. However, the correlation between FS score and FA was not that obvious in the aMCI group. This result was likely observed because FS scores are largely related to vascular risk factors, such as hypoperfusion and ischemia [22, 23], but FA is more related to neuronal degeneration caused by brain amyloid beta (A $\beta$ ) plaques or hyperphosphorylated forms of the protein tau [24, 25], which may not be notable in conventional MRI. It is difficult to determine whether their effects are the result of some unmeasured risk factors or one factor is in the etiological pathway of the other factor. Another difficulty with the FS score is that the abnormal WM signals on the T2-weighted image (T2WI) may reflect a wide spectrum of pathological changes from complete axonal degeneration to relatively benign pathology.

## LIMITATIONS AND FUTURE WORKS

First, our neuropsychological tests are limited by the

primary focus on the cognitive domain of memory. Other cognitive domains, such as executive functions, should be included in the future. Second, the diagnoses for each group primarily relied on clinical diagnoses but lacked suggestive amyloid imaging or histopathological data for AD pathology in all aMCI subjects. Ongoing longitudinal follow-up studies will verify the VaMCI/aMCI subjects who eventually convert to VD or AD. Moreover, we only compared the two most common subtypes of MCI but did not include the healthy control groups and other types of pre-dementia/MCI groups, such as dementia or dementia with Lewy bodies. These pre-dementia/MCI types should be examined in future studies. Finally, our current cohort is based in a single hospital, and the sample size is relatively small. Therefore, the results require further validation by an independent dataset. Further investigation combining population-based multicenter cohorts with a large sample size should be promoted.

## MATERIALS AND METHODS

Sixty-two right-handed subjects, including twenty-eight VaMCI patients (12 men, age range: 46 ~ 77 years) and thirty-four aMCI patients (14 men, age range: 51 ~ 79 years), participated in this study. The two groups were matched in gender, age, and education. The recruited patients were outpatients who were registered at the Neurology Department of XuanWu Hospital, Capital Medical University, Beijing, China, between January 2009 and June 2015. All participants received baseline evaluations, including complete sociodemographic and clinical (cognitive, behavioral, neurological, functional, and physical) data collection. Patient histories were collected from informants, generally spouses or children. Two experienced neurologists performed the diagnoses for the two groups. The medical research ethics committee and the institutional review board of XuanWu Hospital, Capital Medical University, Beijing, China, approved this study. The study was conducted in accordance with approved guidelines, and written informed consent was obtained from all participants.

### Inclusion criteria

#### Criteria for aMCI

Diagnosis of aMCI was made based on recent international consensus criteria, which were adapted as follows [26-29]: 1) subjective cognitive complaints reported by the informant; 2) objective cognitive impairments that did not meet the Diagnostic and Statistical Manual of Mental Disorders (i.e., DSM-V) criteria for dementia; 3) normal or near-normal performance of general cognitive functioning and no or minimum impairments in daily life activities; 4) abnormal memory function, documented by extensive

neuropsychological evaluation; normal general cognitive function, Clinical Dementia Rating Scale (CDR) score = 0.5 [29]; and 5) neuropsychological testing included a Hanchinski ischemic (HIS) score (HIS score  $\leq$  4) and MoCA (Beijing Version); cutoff points of MoCA: 13 (no formal education), 19 (1 to 6 years of education), and 24 (7 or more years of education) [30].

### Criteria for VaMCI

Diagnosis of VaMCI depended on the following criteria [1, 12, 29, 30]: 1) subjective cognitive complaints reported by the participant or his/her caregiver; 2) insufficient cognitive impairment to meet the DSM-V criteria for dementia; 3) vascular etiology as follows: cognitive impairment due to subcortical ischemic vessel disease was defined as moderate WM changes, and/or multiple lacunar infarcts ( $>$  2) on brain imaging; and 4) neuropsychological tests included HIS determination (HIS  $\geq$  7) and MoCA; cutoff points of MoCA: 13 (no formal education), 19 (1 to 6 years of education), and 24 (7 or more years of education) [30]

### Exclusion criteria

Participants were excluded if they exhibited any of the following conditions: 1) psychiatric disease (e.g., depression, Hamilton depression rating scale  $>$  20, Center for Epidemiologic Studies Depression Scale  $>$  21), systemic disease or other neurological disorder; 2) visual or auditory abnormalities that made clinical assessments infeasible; 3) alcohol or drug abuse; 4) insufficient Mandarin language abilities to complete the assessment; 5) MRI contraindications, such as claustrophobia; or 6) marked head-motion according to the MRI image.

The exclusive criteria for VaMCI also included the following conditions: signs of large vascular disease, such as cortical, and/or cortico-subcortical, or non-lacunar territorial infarcts and watershed infarcts or hemorrhages.

### Neuropsychological evaluations

All participants underwent a battery of neuropsychological tests to assess general mental status and other cognitive domains. These tests included CDR scale [28, 29], MMSE [31], MoCA [30], and AVLT [32]. Two attending neurologists performed all evaluations.

### Scanning parameters

The imaging scans were acquired on a 3.0 Tesla Siemens Tim Trio MRI scanner at the XuanWu Hospital. T2WIs were acquired using the following sequence: repetition time (TR) = 4040 ms; echo time (TE) = 84.0 ms; flip angle =  $160^\circ$ ; field of view = 240 mm  $\times$  240 mm; matrix = 186  $\times$  320; 20 slices; and slice thickness = 5.0 mm.

Diffusion MRI imaging sequence: An echo-planar imaging sequence with one zero-weighted image ( $b = 0$  s/mm<sup>2</sup>) and 30 diffusion sensitizing orientations ( $b = 1000$  s/mm<sup>2</sup>) was used with the following parameters: slice thickness = 2 mm; 90 slices; TR = 11000 ms; TE = 98 ms; voxel size = 2 mm isotropic; flip angle =  $90^\circ$ ; acquisition matrix = 128 mm  $\times$  116 mm; and number of averages = 3.

### WMH/lacunar infarct rating

WM lesion severity was rated using a modified FS score [33]. A single experienced investigator analyzed the T2WI scans of each participant and graded WMH signal surrounding the ventricles and deep WM according to FS. Periventricular WMH (PWMH) was graded as 0 = absence, 1 = “caps” or pencil-thin lining, 2 = smooth “halo”, or 3 = irregular periventricular hyperintensities extending into the deep WM. Separate deep WMH signals (DWMH) were rated as 0 = absence, 1 = punctate foci, 2 = beginning confluence of foci, or 3 = large confluent areas. The rater was blinded to the clinical data of participants. The total WMH score was calculated as the sum of the PWMH and DWMH scores [33].

### Diffusion MRI preprocessing

Diffusion-weighted images were processed using PANDA [34], which is an automatic processing pipeline based on Matlab and FSL [35]. The images were skull-stripped. Head movement and eddy current corrections were performed. FA images were calculated. Individual FA images for each subject were co-registered to the Montreal Neurological Institute (MNI) space. These aligned images were averaged and thresholded at 0.2 to extract a mean FA skeleton onto which individual FA data were projected. The MD, AxD, and RD were also calculated and projected onto the same skeleton.

### Statistical analysis

Statistics for demographics were calculated using Chi-squared and Student's t tests, when appropriate. Statistical comparisons of the spatial distributions of abnormal WMH/lacunar infarct regions were performed using a Chi-squared test to evaluate whether there were gross differences in WMH/lacunar infarcts between the two groups.

Statistical analyses were performed on the FA, MD, AxD, and RD data using the TBSS method [36]. The TBSS method applies statistical analyses throughout the entire WM skeleton that was extracted from the mean FA map in the MNI space (see supplementary materials). This method does not require spatial smoothing and provides a more reliable alignment of the WM tracts and overcomes prior

knowledge limitations of the region-of-interest approach while preserving regional information and specificity [36]. The FA, MD, AxD, and RD values for each WM skeleton voxel were statistically compared between the aMCI and VaMCI groups using 2-sample t tests (two-tailed). Age, gender, and education were included as covariates. We used a general linear model (GLM) to determine whether there was a significant “FA, MD, AxD, or RD × group” interaction on cognitive measures or a significant “FA × group” interaction on the FS score. The cognition measures included the MMSE, MoCa and three subtests of the AVLT. The threshold-free cluster enhancement (TFCE) approach with 5000 permutations was used to correct for multiple comparison [37], and FWE corrected  $P < 0.05$  was considered significant.

## ACKNOWLEDGMENTS

This work was supported by the National Natural Science Funds of China (Grant No. 81430037, 31371007, 81301188, 81271649, 81322021, 61633018), Beijing Municipal Science & Technology Commission (Grant No. Z131100006813022, Z141107002514116, Z161100002616020, Z131100006813022), National Key Research and Development Program of China (2016YFC1306300), National Key Department of Neurology funded by Chinese Health and Family Planning Committee, and the 863 program (2015AA020912), as well as Fundamental and Clinical Cooperative Research Program of Capital Medical University (16JL-L08), Health and Family Planning Commission of Shunyi District Beijing, and Opening Foundation of Key Laboratory of Behavioral Science, Chinese Academy of Sciences.

## CONFLICTS OF INTEREST

There is no conflict of interest.

## Author contributions

Yang Yu, acquisition and interpretation of the data, drafting the manuscript

Xinyu Liang, analysis and interpretation of data and drafting the manuscript

Haikuo Yu, revising the manuscript for content

Weina Zhao, acquisition of data, revising the manuscript for content

Yan Lu, revising the manuscript for content

Yue Huang, revising the manuscript for content

Changhao Yin, study concept and design, acquisition of data, study supervision, obtaining funding

Gaolang Gong, study concept and design, acquisition of data, critical revision of manuscript for intellectual content, obtaining funding

Ying Han, study concept and design, acquisition of data, make the diagnosis and neuropsychological evaluations, study supervision, obtaining funding

## REFERENCES

1. Sachdev P, Kalaria R, O'Brien J, Skoog I, Alladi S, Black SE, Blacker D, Blazer DG, Chen C, Chui H, Ganguli M, Jellinger K, Jeste DV, et al. Diagnostic criteria for vascular cognitive disorders: a VASCOG statement. *Alzheimer Dis Assoc Disord*. 2014; 28(3):206-218.
2. Jin-zhou T, Heng-ge X, Bin Q, Dong-sheng F, Jing S and Lu-ning W. Guidelines for the Diagnosis of Vascular Mild Cognitive Impairment in China. *Chinese Journal of Internal Medicine*. 2016; 55(3):249-256.
3. Albert MS, DeKosky ST, Dickson D, Dubois B, Feldman HH, Fox NC, Gamst A, Holtzman DM, Jagust WJ, Petersen RC, Snyder PJ, Carrillo MC, Thies B, et al. The diagnosis of mild cognitive impairment due to Alzheimer's disease: Recommendations from the National Institute on Aging-Alzheimer's Association workgroups on diagnostic guidelines for Alzheimer's disease. *Alzheimer's & Dementia*. 2011; 7(3):270-279.
4. Parikh PK, Troyer AK, Maione AM and Murphy KJ. The Impact of Memory Change on Daily Life in Normal Aging and Mild Cognitive Impairment. *Gerontologist*. 2015; Epub ahead of print.
5. Zhou A and Jia J. Different cognitive profiles between mild cognitive impairment due to cerebral small vessel disease and mild cognitive impairment of Alzheimer's disease origin. *Journal of the International Neuropsychological Society*. 2009; 15(06):898.
6. Graham NL, Emery T and Hodges JR. Distinctive cognitive profiles in Alzheimer's disease and subcortical vascular dementia. *J Neurol Neurosurg Psychiatry*. 2004; 75(1):61-71.
7. Tomadesso C, Perrotin A, Mutlu J, Mezenge F, Landeau B, Egret S, de la Sayette V, Jonin PY, Eustache F, Desgranges B and Chetelat G. Brain structural, functional, and cognitive correlates of recent versus remote autobiographical memories in amnesic Mild Cognitive Impairment. *Neuroimage Clin*. 2015; 8:473-482.
8. Kim SH, Park JS, Ahn HJ, Seo SW, Lee JM, Kim ST, Han SH and Na DL. Voxel-based analysis of diffusion tensor imaging in patients with subcortical vascular cognitive impairment: correlates with cognitive and motor deficits. *J Neuroimaging*. 2011; 21(4):317-324.
9. Lin L, Xue Y, Duan Q, Sun B, Lin H, Chen X, Luo L, Wei X and Zhang Z. Microstructural White Matter Abnormalities and Cognitive Dysfunction in Subcortical Ischemic Vascular Disease: an Atlas-Based Diffusion Tensor Analysis Study. *J Mol Neurosci*. 2015; 56(2):363-370.

10. Liu J, Yin C, Xia S, Jia L, Guo Y, Zhao Z, Li X, Han Y and Jia J. White matter changes in patients with amnesic mild cognitive impairment detected by diffusion tensor imaging. *PLoS One*. 2013; 8(3):e59440.
11. Wang JH, Lv PY, Wang HB, Li ZL, Li N, Sun ZY, Zhao BH and Huang Y. Diffusion tensor imaging measures of normal appearing white matter in patients who are aging, or have amnesic mild cognitive impairment, or Alzheimer's disease. *J Clin Neurosci*. 2013; 20(8):1089-1094.
12. Yi L, Wang J, Jia L, Zhao Z, Lu J, Li K, Jia J, He Y, Jiang C and Han Y. Structural and functional changes in subcortical vascular mild cognitive impairment: a combined voxel-based morphometry and resting-state fMRI study. *PLoS One*. 2012; 7(9):e44758.
13. Chen TF, Lin CC, Chen YF, Liu HM, Hua MS, Huang YC and Chiu MJ. Diffusion tensor changes in patients with amnesic mild cognitive impairment and various dementias. *Psychiatry Res*. 2009; 173(1):15-21.
14. Zarei M, Damoiseaux JS, Morgese C, Beckmann CF, Smith SM, Matthews PM, Scheltens P, Rombouts SA and Barkhof F. Regional white matter integrity differentiates between vascular dementia and Alzheimer disease. *Stroke*. 2009; 40(3):773-779.
15. Aralasmak A, Ulmer JL, Kocak M, Salvan CV, Hillis AE and Yousem DM. Association, commissural, and projection pathways and their functional deficit reported in literature. *J Comput Assist Tomogr*. 2006; 30(5):695-715.
16. Bai F, Shu N, Yuan Y, Shi Y, Yu H, Wu D, Wang J, Xia M, He Y and Zhang Z. Topologically Convergent and Divergent Structural Connectivity Patterns between Patients with Remitted Geriatric Depression and Amnesic Mild Cognitive Impairment. 2012; 32(12):4307-4318.
17. Fu JL, Zhang T, Chang C, Zhang YZ and Li WB. The value of diffusion tensor imaging in the differential diagnosis of subcortical ischemic vascular dementia and Alzheimer's disease in patients with only mild white matter alterations on T2-weighted images. *Acta Radiologica*. 2012; 53(3):312-317.
18. Matthews PM, Filippini N and Douaud G. Brain structural and functional connectivity and the progression of neuropathology in Alzheimer's disease. *J Alzheimers Dis*. 2013; 33 Suppl 1:S163-172.
19. Feldman HM, Yeatman JD, Lee ES, Barde LH and Gaman-Bean S. Diffusion tensor imaging: a review for pediatric researchers and clinicians. *J Dev Behav Pediatr*. 2010; 31(4):346-356.
20. Alexander AL, Hurley SA, Samsonov AA, Adluru N, Hosseinbor AP, Mossahebi P, Tromp DPM, Zakszewski E and Field AS. Characterization of Cerebral White Matter Properties Using Quantitative Magnetic Resonance Imaging Stains. *Brain Connectivity*. 2011; 1(6):423-446.
21. Kapeller P, Barber R, Vermeulen RJ, Ader H, Scheltens P, Freidl W, Almkvist O, Moretti M, Del Ser T, Vaghfeldt P, Enzinger C, Barkhof F, Inzitari D, et al. Visual Rating of Age-Related White Matter Changes on Magnetic Resonance Imaging: Scale Comparison, Interrater Agreement, and Correlations With Quantitative Measurements. *Stroke*. 2003; 34(2):441-445.
22. Yoon B, Shim YS, Cheong HK, Hong YJ, Lee KS, Park KH, Ahn KJ, Kim DJ, Kim YD, Choi SH and Yang DW. White matter hyperintensities in mild cognitive impairment: clinical impact of location and interaction with lacunes and medial temporal atrophy. *J Stroke Cerebrovasc Dis*. 2014; 23(5):e365-372.
23. Papma JM, den Heijer T, de Koning I, Mattace-Raso FU, van der Lugt A, van der Lijn F, van Swieten JC, Koudstaal PJ, Smits M and Prins ND. The influence of cerebral small vessel disease on default mode network deactivation in mild cognitive impairment. *Neuroimage Clin*. 2012; 2:33-42.
24. Haglund M and Englund E. Cerebral Amyloid Angiopathy, White Matter Lesions and Alzheimer Encephalopathy – A Histopathological Assessment. *Dementia & Geriatric Cognitive Disorders*. 2002; 14(3):161-166.
25. Mufson EJ, Binder L, Counts SE, DeKosky ST, de Toledo-Morrell L, Ginsberg SD, Ikonomic MD, Perez SE and Scheff SW. Mild cognitive impairment: pathology and mechanisms. *Acta Neuropathol*. 2012; 123(1):13-30.
26. Bowler JV. Modern concept of vascular cognitive impairment. *British Medical Bulletin*. 2007; 83(1):291-305.
27. Erkinjuntti T, Inzitari D, Pantoni L, Wallin A, Scheltens P, Rockwood K, Roman GC, Chui H and Desmond DW. Research criteria for subcortical vascular dementia in clinical trials. *J Neural Transm Suppl*. 2000; 59:23-30.
28. Morris JC. The Clinical Dementia Rating (CDR): current version and scoring rules. *Neurology*. 1993; 43(11):2412-2414.
29. Petersen RC. Mild cognitive impairment as a diagnostic entity. *J Intern Med*. 2004; 256(3):183-194.
30. Lu J, Li D, Li F, Zhou A, Wang F, Zuo X, Jia XF, Song H and Jia J. Montreal Cognitive Assessment in Detecting Cognitive Impairment in Chinese Elderly Individuals: A Population-Based Study. *Journal of Geriatric Psychiatry and Neurology*. 2012; 24(4):184-190.
31. Zhang Z, Hong X and Hui LI. The minimal state examination in the Chinese residents population aged 55 years and over in the urban and rural areas of Beijing. *Chinese Journal of Neurology*. 1999; 03:149-153.
32. Delis D. C KJHK. (1987). *California Verbal Learning Test: Adult Version Manual*. (San Antonio, Tex, USA: The Psychological Corporation).
33. Fazekas F, Chawluk JB, Alavi A, Hurtig HI and Zimmerman RA. MR signal abnormalities at 1.5 T in Alzheimer's dementia and normal aging. *AJR Am J Roentgenol*. 1987; 149(2):351-356.
34. Cui Z, Zhong S, Xu P, He Y and Gong G. PANDA: a pipeline toolbox for analyzing brain diffusion images. *Front Hum Neurosci*. 2013; 7:42.
35. Jenkinson M, Beckmann CF, Behrens TE, Woolrich MW



- and Smith SM. *FSL*. *Neuroimage*. 2012; 62(2):782-790.
36. Smith SM, Jenkinson M, Johansen-Berg H, Rueckert D, Nichols TE, Mackay CE, Watkins KE, Ciccarelli O, Cader MZ, Matthews PM and Behrens TE. Tract-based spatial statistics: voxelwise analysis of multi-subject diffusion data. *Neuroimage*. 2006; 31(4):1487-1505.
37. Smith SM and Nichols TE. Threshold-free cluster enhancement: addressing problems of smoothing, threshold dependence and localisation in cluster inference. *Neuroimage*. 2009; 44(1):83-98.
